# Supplementary material for: Acquired buried penis: an observational study characterizing the variability in procedural codes reported during surgery
Source: PubMed Central journal article supplement — Transl Androl Urol. 2024 Oct 28;13(10):2229–37. doi: 10.21037/tau-24-350 (PMC11535738; doi:10.21037/tau-24-350), 2024-10-28
Supplement: tau-13-10-2229-supplementary.pdf [file tau-13-10-2229-supplementary.pdf]

**Table S1** List of all CPT codes reported according to anatomic category

| Anatomic category                   | CPT code                     | Description                                                                                                                                                                                                                   | N                   |
|-------------------------------------|------------------------------|-------------------------------------------------------------------------------------------------------------------------------------------------------------------------------------------------------------------------------|---------------------|
| Penile procedures<br>(N=98)         | 54300                        | Penile straightening chordee                                                                                                                                                                                                  | 26                  |
|                                     | 54360                        | Plastic repair of penis with correct angulation                                                                                                                                                                               | 21                  |
|                                     | 54161                        | Circumcision at age >28 days                                                                                                                                                                                                  | 13                  |
|                                     | 15004                        | Preparation of a body area with an open wound, burn eschar, or scar contracture for the placement of a skin graft ( $\leq 100$ cm <sup>2</sup> )                                                                              | 7                   |
|                                     | 54304                        | Surgical correction of penile curvature or initial stage of hypospadias repair, with or without the use of prepuce or skin flaps for reconstruction                                                                           | 6                   |
|                                     | 54060                        | Destruction of penile lesion with simple surgical excision                                                                                                                                                                    | 4                   |
|                                     | 54001                        | Incision of the prepuce, either on the dorsal or lateral side, as a separate procedure, for patients older than 28 days                                                                                                       | 4                   |
|                                     | 54120                        | Partial amputation of penis                                                                                                                                                                                                   | 2                   |
|                                     | 54150                        | Circumcision with clamp, other device with block                                                                                                                                                                              | 2                   |
|                                     | 54065                        | Extensive destruction of penile lesion                                                                                                                                                                                        | 2                   |
|                                     | 54162                        | Lysis/excision of post-circumcision penile adhesions                                                                                                                                                                          | 2                   |
|                                     | 54163                        | Repair of incomplete circumcision                                                                                                                                                                                             | 2                   |
|                                     | 54440                        | Plastic operation of penile injury                                                                                                                                                                                            | 2                   |
|                                     | 54450                        | Foreskin manipulation with stretching and lysis of preputial adhesions                                                                                                                                                        | 1                   |
|                                     | 54164                        | Penile frenulectomy                                                                                                                                                                                                           | 1                   |
|                                     | 54405                        | Surgical placement of a multi-component inflatable penile prosthesis, including the insertion of inflatable cylinders, a pump, and a reservoir into the penis                                                                 | 1                   |
|                                     | 15002                        | Surgical incision of skin with an open wound, burn eschar, or scar contracture, preparing the area for a skin graft ( $\leq 100$ cm <sup>2</sup> )                                                                            | 1                   |
|                                     | 15003                        | Preparation of skin with an open wound, scar contracture, or burn eschar for the placement of a skin graft ( $> 100$ cm <sup>2</sup> )                                                                                        | 1                   |
|                                     | Scrotal procedures<br>(N=49) | 55175                                                                                                                                                                                                                         | Simple scrotoplasty |
| 55180                               |                              | Complicated scrotoplasty                                                                                                                                                                                                      | 18                  |
| 55150                               |                              | Resection of scrotum                                                                                                                                                                                                          | 3                   |
| 55110                               |                              | Scrotal exploration                                                                                                                                                                                                           | 1                   |
| Pannus-related<br>procedures (N=77) | 15830                        | Excision of skin abdominal infraumbilical panniculectomy                                                                                                                                                                      | 58                  |
|                                     | 15839                        | Removal of excess skin and subcutaneous tissue from a specified area of the body                                                                                                                                              | 7                   |
|                                     | 15877                        | Suction-assisted removal of fat from the trunk area                                                                                                                                                                           | 5                   |
|                                     | 15847                        | Excision of excessive skin & subcutaneous tissue of the abdomen                                                                                                                                                               | 3                   |
|                                     | 13132                        | Complex repair of a wound involving procedures such as scar revision, debridement, extensive tissue undermining, and the use of stents or retention sutures, along with a layered closure, for wounds measuring 2.6 to 7.5 cm | 2                   |
|                                     | 13100                        | Complex repair of trunk wound (1.1-2.5 cm)                                                                                                                                                                                    | 1                   |
|                                     | 13101                        | Complex repair of trunk wound (2.6-7.5 cm)                                                                                                                                                                                    | 1                   |
| Skin grafts (N=63)                  | 15120                        | Application of a split-thickness skin graft to areas such as the face, scalp, eyelids, mouth, neck, ears, orbits, genitalia, hands, feet, or multiple digits, covering up to 100 cm <sup>2</sup>                              | 27                  |
|                                     | 15240                        | Full-thickness skin graft applied to areas such as the forehead, cheeks, chin, mouth, neck, axillae, genitalia, hands, or feet, covering up to 20 cm <sup>2</sup>                                                             | 14                  |
|                                     | 15100                        | Split-thickness autograft from the trunk, arms, or legs ( $\leq 100$ cm <sup>2</sup> )                                                                                                                                        | 8                   |
|                                     | 15241                        | Full-thickness skin graft applied to areas such as the forehead, cheeks, chin, mouth, neck, axillae, genitalia, hands, or feet, covering greater than 20 cm <sup>2</sup>                                                      | 5                   |
|                                     | 15121                        | Application of a split-thickness skin graft to areas such as the face, scalp, eyelids, mouth, neck, ears, orbits, genitalia, hands, feet, or multiple digits, covering more than 100 cm <sup>2</sup>                          | 4                   |
|                                     | 15101                        | Split-thickness autograft from the trunk, arms, or legs ( $> 100$ cm <sup>2</sup> )                                                                                                                                           | 2                   |
|                                     | 15275                        | Application of a skin substitute, such as an allograft or xenograft, to cover wounds on the face, scalp, eyelids, mouth, neck, ears, orbits, genitalia, hands, feet, or multiple digits, for areas up to 20 cm <sup>2</sup>   | 2                   |
|                                     | 15200                        | Full-thickness skin graft of the trunk ( $\leq 20$ cm <sup>2</sup> )                                                                                                                                                          | 1                   |
| Tissue transfers/<br>flaps (N=55)   | 14301                        | Replacement of lesions in any area with healthy tissues from an adjacent site (30.1-60 cm <sup>2</sup> )                                                                                                                      | 14                  |
|                                     | 15734                        | Muscle, myocutaneous, or fasciocutaneous flap obtained from the trunk                                                                                                                                                         | 12                  |
|                                     | 14302                        | Replacement of lesions in any area with healthy tissues from an adjacent site (additional 30 cm <sup>2</sup> )                                                                                                                | 10                  |
|                                     | 14040                        | Transfer of healthy tissue from an adjacent area to replace lesions on the forehead, cheeks, chin, mouth, neck, axillae, genitalia, hands, or feet, for areas up to 10 cm <sup>2</sup>                                        | 9                   |
|                                     | 14041                        | Transfer of healthy tissue from an adjacent area to replace lesions on the forehead, cheeks, chin, mouth, neck, axillae, genitalia, hands, or feet, for areas measuring 10.1 cm <sup>2</sup> to 30 cm <sup>2</sup>            | 5                   |
|                                     | 15740                        | Formation of an island pedicle flap by making incisions around healthy skin and tissue at the donor site, lifting it, and transferring it to cover a wound or injury                                                          | 3                   |
|                                     | 14000                        | Replacement of lesions in the patient's trunk by using healthy tissues from an adjacent site ( $\leq 10$ cm <sup>2</sup> )                                                                                                    | 2                   |

Table S1 (continued)

**Table S1** (continued)

| Anatomic category             | CPT code                   | Description                                                                                                                                                                                                                          | N                                              |
|-------------------------------|----------------------------|--------------------------------------------------------------------------------------------------------------------------------------------------------------------------------------------------------------------------------------|------------------------------------------------|
| Urethral procedures<br>(N=41) | 52000                      | Cystourethroscopy                                                                                                                                                                                                                    | 10                                             |
|                               | 52281                      | Cystourethroscopy with dilation or ureteral stricture or stenosis                                                                                                                                                                    | 5                                              |
|                               | 53899                      | Unlisted procedures in the urinary system                                                                                                                                                                                            | 3                                              |
|                               | 53400                      | Urethroplasty two stage repair                                                                                                                                                                                                       | 3                                              |
|                               | 53010                      | Urethrotomy/urethrostomy for perineal urethral stricture                                                                                                                                                                             | 2                                              |
|                               | 53415                      | Urethroplasty with a transpubic or perineal reconstruction                                                                                                                                                                           | 2                                              |
|                               | 53600                      | Dilation of urethral stricture                                                                                                                                                                                                       | 2                                              |
|                               | 53410                      | Urethroplasty with grafting tissue from bladder epithelium or buccal mucosa to the excision site                                                                                                                                     | 2                                              |
|                               | 53450                      | Surgical reconstruction of the urethral meatus with mucosal tissue advancement                                                                                                                                                       | 2                                              |
|                               | 52344                      | Cystourethroscopy with treatment of ureteral stricture                                                                                                                                                                               | 1                                              |
|                               | 52275                      | Cystourethroscopy with internal urethrotomy                                                                                                                                                                                          | 1                                              |
|                               | 53601                      | Subsequent dilation of urethral stricture                                                                                                                                                                                            | 1                                              |
|                               | 53620                      | Dilation of a urethral stricture using a filiform and follower technique                                                                                                                                                             | 1                                              |
|                               | 53460                      | Surgical reconstruction of the urethral meatus involving partial removal of the distal urethral segment                                                                                                                              | 1                                              |
|                               | 54324                      | Single-stage repair of distal hypospadias, with or without chordee correction or circumcision, including urethroplasty using local skin flaps (e.g., flip-flap or preputial flap)                                                    | 1                                              |
|                               | 54328                      | Single-stage distal hypospadias repair, with or without chordee correction or circumcision, involving extensive dissection to correct chordee and urethroplasty using local skin flaps, a skin graft patch, and/or an island flap    | 1                                              |
|                               | 54340                      | Repair of hypospadias complications, such as fistula, stricture, or diverticula, through simple closure, incision, or excision                                                                                                       | 1                                              |
|                               | 54344                      | Repair of hypospadias complications, such as fistula, stricture, or diverticula, requiring mobilization of skin flaps and urethroplasty with the use of a flap or patch graft                                                        | 1                                              |
|                               | 54352                      | Repair of hypospadias cripple involving extensive dissection and removal of previously constructed structures, including re-release of chordee, and reconstruction of the urethra and penis using local skin grafts and island flaps | 1                                              |
|                               | Other procedures<br>(N=30) | 55899                                                                                                                                                                                                                                | Unlisted procedures in the male genital system |
| 51102                         |                            | Aspiration of the bladder followed by the placement of a suprapubic catheter                                                                                                                                                         | 2                                              |
| 11426                         |                            | Removal of a benign lesion, excluding skin tags, with margins from the skin of the scalp, neck, hands, feet, or genitals, for lesions larger than 4 cm                                                                               | 2                                              |
| 54640                         |                            | Surgical relocation of an undescended testicle into the scrotum using an inguinal and/or scrotal approach                                                                                                                            | 2                                              |
| 54512                         |                            | Removal of a lesion located outside the parenchyma of the testis                                                                                                                                                                     | 1                                              |
| 51705                         |                            | Simple change of cystotomy tube                                                                                                                                                                                                      | 1                                              |
| 51040                         |                            | Cystostomy, cystotomy with drainage                                                                                                                                                                                                  | 1                                              |
| 11420                         |                            | Removal of a benign lesion, excluding skin tags, with margins from the skin of the scalp, neck, hands, feet, or genitals, for lesions up to 0.5 cm                                                                                   | 1                                              |
| 11421                         |                            | Removal of a benign lesion, excluding skin tags, with margins from the skin of the scalp, neck, hands, feet, or genitals, for lesions between 0.6 and 1 cm                                                                           | 1                                              |
| 55520                         |                            | Removal of diseased or damaged tissue from the spermatic cord in the scrotum                                                                                                                                                         | 1                                              |
| 55041                         |                            | Excision of bilateral hydrocele                                                                                                                                                                                                      | 1                                              |
| 51703                         |                            | Complicated insertion of a temporary indwelling bladder catheter                                                                                                                                                                     | 1                                              |
| 97607                         |                            | Negative pressure wound therapy ( $\leq 50$ cm <sup>2</sup> )                                                                                                                                                                        | 1                                              |
| 97606                         |                            | Negative pressure wound therapy ( $> 50$ cm <sup>2</sup> )                                                                                                                                                                           | 1                                              |
| 54520                         |                            | Simple orchiectomy (scrotal or inguinal approach)                                                                                                                                                                                    | 1                                              |
| 17110                         |                            | Destruction of up to 14 benign lesions using techniques such as chemosurgery, cryosurgery, electrosurgery, or others                                                                                                                 | 1                                              |
| 15852                         |                            | Dressing change under anesthesia (unrelated to burn)                                                                                                                                                                                 | 1                                              |
| 51701                         |                            | Placement of a temporary bladder catheter, such as a straight catheter, for purposes like residual urine measurement                                                                                                                 | 1                                              |
| 17999                         |                            | Unlisted procedure involving the skin, mucous membrane, or subcutaneous tissue                                                                                                                                                       | 1                                              |

**Table S2** Excluded CPT codes

| CPT   | Description                                                                                                                                                      | Frequency |
|-------|------------------------------------------------------------------------------------------------------------------------------------------------------------------|-----------|
| 11000 | Debridement of extensive areas of eczematous or infected skin; for each additional 10% of body surface area, or a portion of it                                  | 2         |
| 11042 | Debridement of subcutaneous tissue, including the epidermis and dermis if needed, for the first 20 square centimeters or less                                    | 2         |
| 11043 | Debridement of muscle and/or fascia, which may also include the epidermis, dermis, and subcutaneous tissue if necessary, for an area up to 20 square centimeters | 3         |
| 11463 | Removal of skin and subcutaneous tissue for hidradenitis in the inguinal region, followed by complex repair                                                      | 1         |
| 11626 | Removal of a malignant lesion, including margins, from the face, ears, eyelids, nose, or lips, with an excised diameter greater than 4.0 cm                      | 1         |
| 49505 | Repair, recurrent inguinal hernia, any age; initial inguinal                                                                                                     | 2         |
| 49560 | Initial repair of a reducible inguinal hernia in patients aged 5 years or older                                                                                  | 1         |
| 49568 | Initial repair of an incarcerated or strangulated inguinal hernia in patients aged 5 years or older                                                              | 1         |
| 55250 | Hernia repair, other than hiatus (ex. femoral, obturator, spigelian, umbilical, epigastric, or incisional hernia); reducible                                     | 1         |

**Table S3** Top 10 most frequent procedures performed. This includes cases where only a single anatomic category was addressed or where multiple anatomic categories were addressed

| Type of procedure                               | Frequency of patients [% of total] |
|-------------------------------------------------|------------------------------------|
| Penile procedure only                           | 14 [10]                            |
| Pannus-related + skin graft                     | 11 [8]                             |
| Penile procedure + tissue transfer              | 9 [6]                              |
| Pannus-related procedure only                   | 9 [6]                              |
| Penile + pannus-related procedures              | 8 [5]                              |
| Penile + scrotal procedures                     | 4 [3]                              |
| Penile procedure + tissue transfer + skin graft | 4 [3]                              |
| Penile + urethral procedures                    | 4 [3]                              |
| Pannus-related + scrotal procedures             | 4 [3]                              |
| Tissue transfer only                            | 4 [3]                              |

**Table S4** Differences in ABP procedures performed by surgical specialty. Due to small sample size of cases done by general surgery (N=5), they were not included for comparison

| Anatomic category         | Plastics (N=40) | Urology (N=101) | P value |
|---------------------------|-----------------|-----------------|---------|
| Penile procedures         | 15 (38%)        | 61 (60%)        | 0.01    |
| Pannus-related procedures | 25 (63%)        | 39 (39%)        | 0.01    |
| Scrotal procedures        | 8 (20%)         | 37 (37%)        | 0.06    |
| Urethral procedures       | 7 (18%)         | 23 (23%)        | 0.49    |
| Skin grafts               | 15 (38%)        | 35 (35%)        | 0.75    |
| Tissue transfers          | 13 (33%)        | 26 (26%)        | 0.42    |
| Other                     | 5 (13%)         | 18 (18%)        | 0.44    |
